# Supplementary material for: Benzimidazole Derivatives Suppress Fusarium Wilt Disease via Interaction with ERG6 of Fusarium equiseti and Activation of the Antioxidant Defense System of Pepper Plants
Source: MDPI journal article supplement (doi:10.3390/jof9020244), 2023-02-12
Supplement: s1 [file s1]

*Supplementary materials*

# **Benzimidazole Derivatives Suppress Fusarium Wilt Disease via Interaction with *ERG6* of *Fusarium equiseti* and Activation of the Antioxidant Defense System of Pepper Plants**

Asmaa El-Nagar <sup>1,†</sup>, Abdelnaser A. Elzaawely <sup>1</sup>, Hassan M. El-Zahaby <sup>1</sup>, Tran Dang Xuan <sup>2,3</sup>,  
Tran Dang Khanh <sup>4,5</sup>, Mohamed Gaber <sup>6</sup>, Nadia El-Wakeil <sup>6</sup>, Yusif El-Sayed <sup>6</sup> and Yasser Nehela <sup>1,\*</sup>

<sup>1</sup> Department of Agricultural Botany, Faculty of Agriculture, Tanta University, Tanta 31527, Egypt

<sup>2</sup> Transdisciplinary Science and Engineering Program, Graduate School of Advanced Science and Engineering, Hiroshima University, Hiroshima 739-8529, Japan

<sup>3</sup> Center for the Planetary Health and Innovation Science (PHIS), The IDEC Institute, Hiroshima University, Hiroshima 739-8529, Japan

<sup>4</sup> Agricultural Genetic Institute, Pham Van Dong Street, Hanoi 122000, Vietnam

<sup>5</sup> Center for Agricultural Innovation, Vietnam National University of Agriculture, Hanoi 131000, Vietnam

<sup>6</sup> Chemistry Department, Faculty of Science, Tanta University, Tanta 31527, Egypt

\* Correspondence: yasser.nehela@ufl.edu

† These authors contributed equally to this work.

**Supplementary Table S1. Sequences from *Fusarium equiseti* that produce significant Alignment with sterol 24-C-methyltransferase (ERG6) gene from *Fusarium oxysporum* NRRL 32931 <sup>a</sup>.**

| Gene Description        | Protein           |     |                                    |                       | Protein-Protein Alignment statistics |             |                 |              |         |
|-------------------------|-------------------|-----|------------------------------------|-----------------------|--------------------------------------|-------------|-----------------|--------------|---------|
|                         | GenBank Accession | aa  | Theoretical isoelectric point (pI) | Molecular weight (MW) | Max Score                            | Total Score | Query Cover (%) | Identity (%) | E value |
| Unnamed Protein Product | CAG7563035.1      | 381 | 5.93                               | 42536.94              | 715                                  | 715         | 100             | 95.03        | 0.0     |
| Unnamed Protein Product | CAG7563809.1      | 381 | 5.57                               | 43083.56              | 498                                  | 498         | 96              | 67.12        | 1e-177  |
| Unnamed Protein Product | CAG7563160.1      | 345 | 5.55                               | 38171.43              | 76.6                                 | 76.6        | 52              | 27.98        | 9e-16   |
| Unnamed Protein Product | CAG7562504.1      | 279 | 6.22                               | 30823.11              | 64.7                                 | 64.7        | 27              | 32.38        | 5e-12   |
| Unnamed Protein Product | CAG7562905.1      | 521 | 6.06                               | 59867.38              | 47.0                                 | 47.0        | 46              | 22.16        | 6e-06   |
| Unnamed Protein Product | CAG7563468.1      | 246 | 5.49                               | 27835.68              | 39.7                                 | 39.7        | 26              | 22.12        | 7e-04   |

<sup>a</sup> The listed putative gene candidates were identified using the protein-protein BLAST (BLASTp) using sterol 24-C-methyltransferase (*FoEGR6*; GenBank accession no. XP\_031038350.1; 382 aa) from *Fusarium oxysporum* NRRL 32931 as a query sequence against *F. equiseti* genome available in GenBank, national center for biotechnology information website (NCBI, <http://www.ncbi.nlm.nih.gov/gene/>), using the compositionally adjusted substitution matrices [44,57].

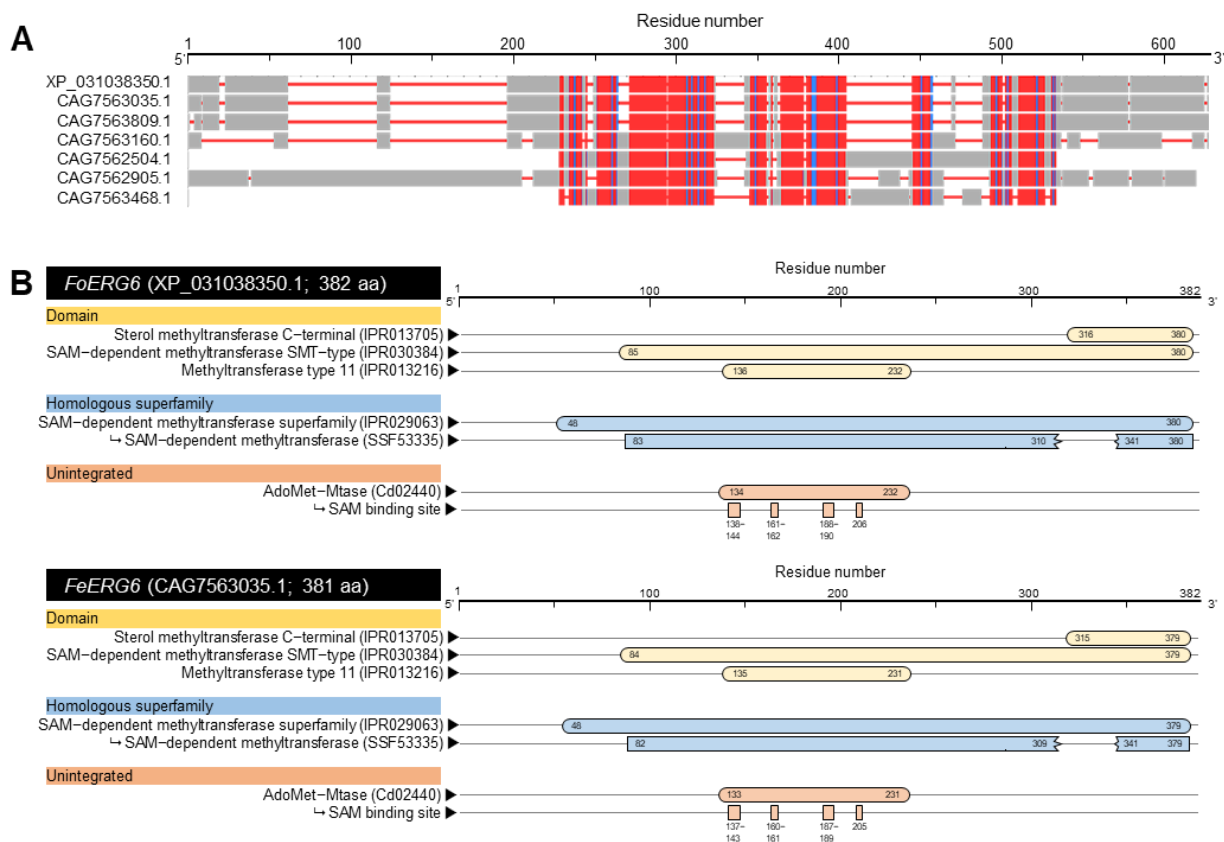

**Supplementary Figure S1. *In silico* analysis of Sterol 24-C-methyltransferase (EGR6) of *Fusarium equiseti*.** (A) Multiple protein sequence alignments of EGR6 from *F. oxysporum* and its homologs from *F. equiseti* using the Constraint-Based Alignment tool (COBALT). (B) The protein functional and conserved domains analysis of FoEGR6 (XP\_031038350.1) and FeEGR6 (CAG7563035.1) using the InterPro Scan tool.

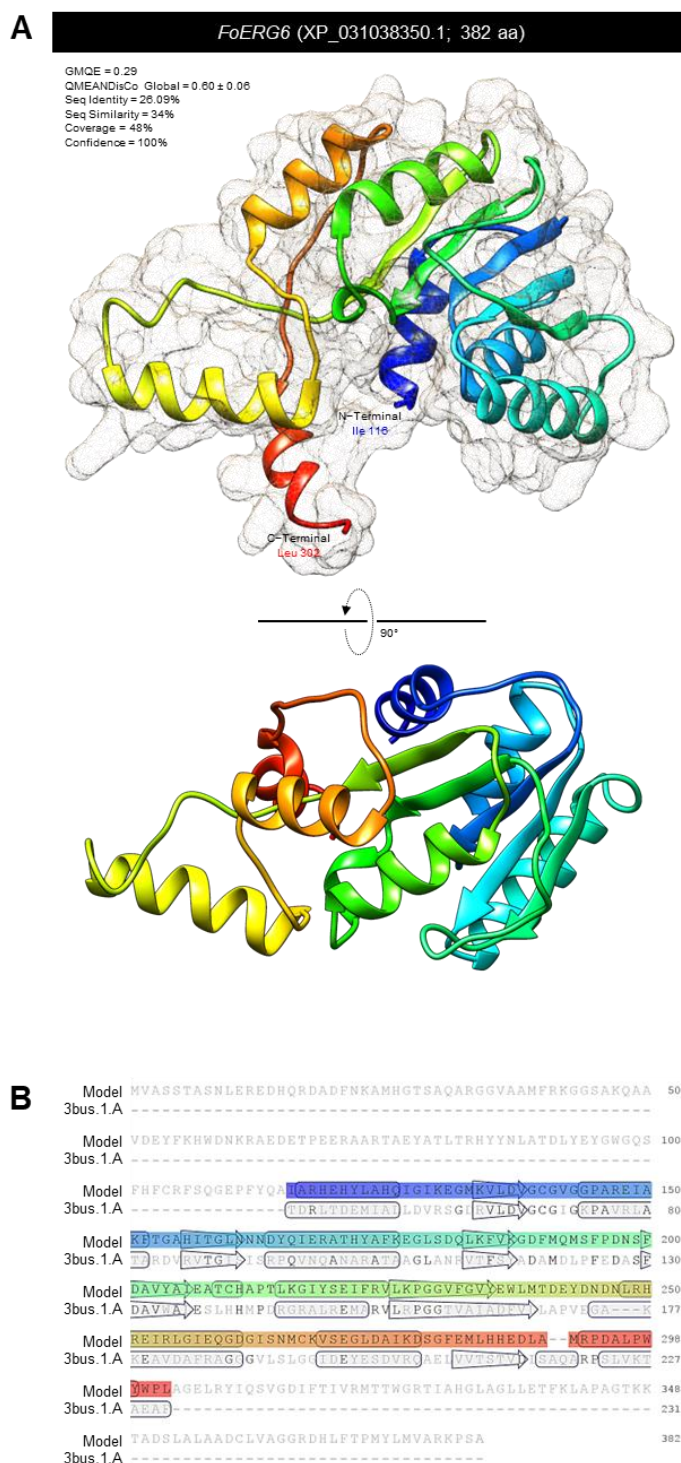

**Supplementary Figure S2. The crystallographic three-dimensional (3D) modeling of 24-C-methyltransferase from *F. oxysporum* (*FoERG6*). (A) The predicted 3D structure model and its associated mesh surface of *FoERG6* (XP\_031038350.1) from *F. oxysporum*. (B) Model–template alignment of *FoERG6* from *F. oxysporum*. GMQE: Global model quality.**

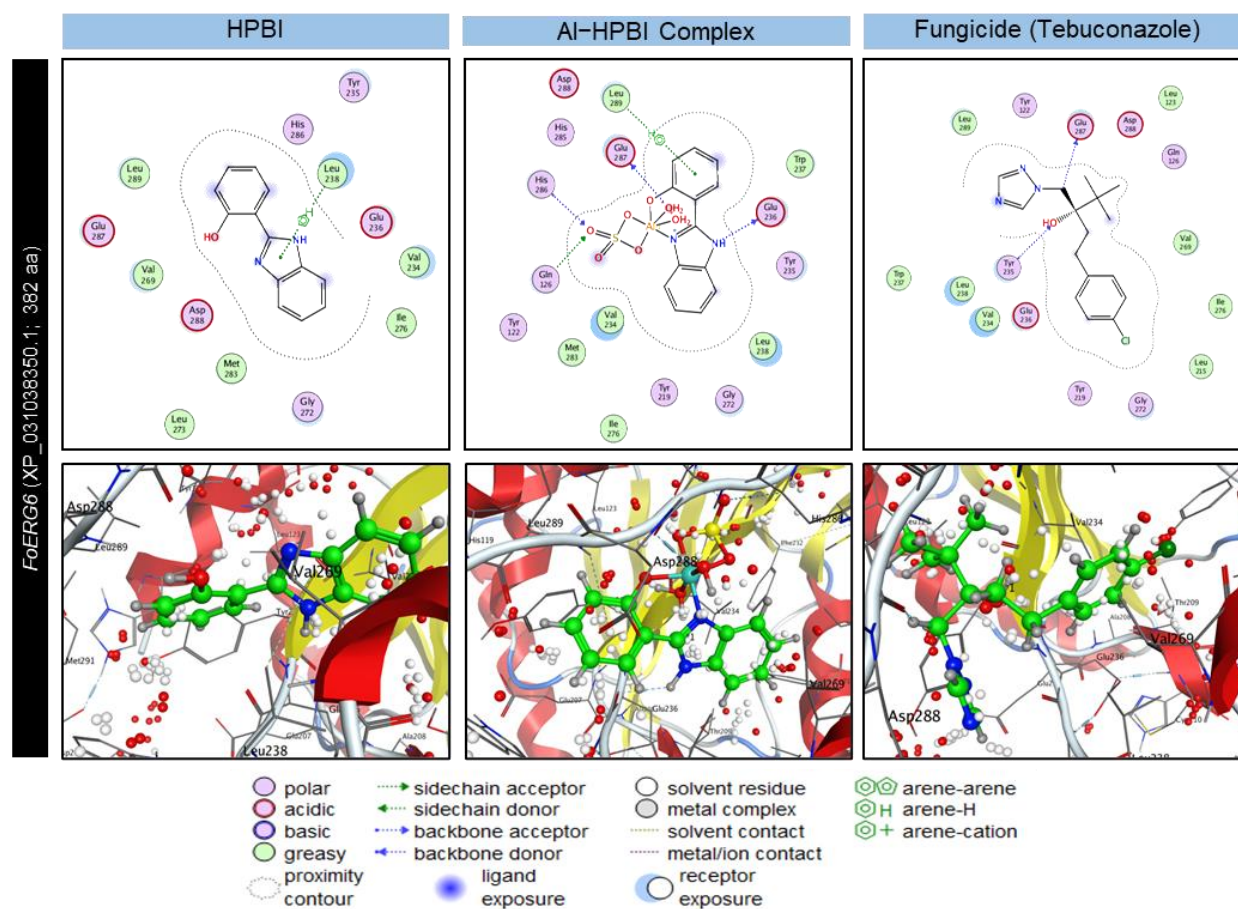

Supplementary Figure S3. Two-dimensional (2D) and three-dimensional (3D) docking interaction of HPBI, AI-HPBI Complex, and Fungicide (Tebuconazole) with 24-C-methyltransferase from *F. oxysporum* (FoERG6; XP\_031038350.1).
